# Supplementary material
Source: MDPI journal article supplement (https://www.mdpi.com/2071-1050/14/6/3678)
Supplement: s1 [file s1 › sustainability-1596081-supplementary.pdf]

**Table S1.** Classification of hazardous medical wastes, as per the Republic of Korea.

|                  | General medical wastes | Hazardous medical wastes |             |        |                   |                         |                    | Infectious medical wastes |
|------------------|------------------------|--------------------------|-------------|--------|-------------------|-------------------------|--------------------|---------------------------|
|                  |                        | Body parts or fluids     | Placenta    | Sharps | Pathological test | Biological and chemical | Blood-contaminated |                           |
| Infection        | not likely             |                          | likely      | likely | Significant       |                         | likely             | very significant          |
| Injury           |                        |                          |             | likely | Significant       |                         |                    | likely                    |
| Intoxication     | not likely             |                          |             |        |                   | very significant        |                    |                           |
| Ethical concerns | not likely             |                          | Significant |        | not likely        |                         | likely             |                           |

**Table S2.** Comparison of regulations regarding medical waste management methods such as discharge/container, storage, transport, and disposal.

|                                                                                       | Republic of Korea                    | USA                                      | Germany                                         | Belgium                      | Japan                                            | China                                                                       |
|---------------------------------------------------------------------------------------|--------------------------------------|------------------------------------------|-------------------------------------------------|------------------------------|--------------------------------------------------|-----------------------------------------------------------------------------|
| Temperature (°C) at which infectious wastes are stored<br>(number of days of storage) | ≤4°C<br>(7 days)                     | Mississippi: ≤6°C                        | ≤15°C<br>(7 days)                               | ≤7°C                         | -                                                | (2 days)                                                                    |
| Dependence on on-site disposal allowed                                                | Very low                             | Low~medium<br>(dependence is increasing) | Low                                             | Very low                     | Low<br>(dependence is decreasing)                | Low~medium<br>(dependence is increasing)                                    |
| Method of on-site disposal allowed                                                    | Microwave, etc.<br>(only 1 hospital) | Chemical, steam,<br>microwave, etc.      | Steam (autoclaving<br>etc.), microwave          | Autoclaving<br>only          | Melting, steam,<br>dried, sterilization,<br>etc. | Chemical<br>disposal, steam<br>sterilization,<br>microwave,<br>incineration |
| Landfill allowed after on-site disposal (sterilization)                               | -<br>(should be incinerated)         | ×                                        | ×<br>(recycling and incineration are preferred) | -<br>(should be incinerated) | ×                                                | ×                                                                           |
| On-site incinerator allowed                                                           | ×                                    | ×                                        | -                                               | -                            | -                                                | -                                                                           |
| Distance from hospital to the off-site incinerator                                    | Long<br>(~350 km; ~4 h)              | Long<br>(~500 km)                        | Medium<br>(~100 km; <2 h)                       | Short<br>(<1.5 h)            | Medium<br>(~100 km; 2 h)                         | Long                                                                        |
| Temperature (°C) at which infectious waste are transported (regulation)               | 4°C                                  | -                                        | Practically kept at 0 °C                        | -                            | -<br>(vehicle with cargo is permitted)           | -                                                                           |

|                                                                                                                 |                                        |                                       |                                                                        |                                                                                                             |                                                                                                                               |                                        |
|-----------------------------------------------------------------------------------------------------------------|----------------------------------------|---------------------------------------|------------------------------------------------------------------------|-------------------------------------------------------------------------------------------------------------|-------------------------------------------------------------------------------------------------------------------------------|----------------------------------------|
|                                                                                                                 |                                        | (vehicle with cargo is permitted)     | (there are regulations on pressure difference rather than temperature) | (vehicle with cargo is permitted)                                                                           |                                                                                                                               | (vehicle with cargo is permitted)      |
| Transporting vehicles allowed for only medical waste                                                            | ✖                                      | -                                     | -                                                                      | -                                                                                                           | -                                                                                                                             | ✖                                      |
| Dependence on off-site incineration                                                                             | Very high                              | Low                                   | High                                                                   | Very high                                                                                                   | Medium (getting higher)                                                                                                       | Low                                    |
| Incinerator allowed for only medical waste                                                                      | ✖                                      | -                                     | -                                                                      | ✖                                                                                                           | -                                                                                                                             | -                                      |
| Disposal of EWC 18 0104/ 18/02/03 (wastes whose collection and disposal is not subject to special requirements) | From special container to incineration | Can be disposed of as municipal waste | Can be disposed of as municipal wastes                                 | Wastes contacted by blood are assumed as high-risk medical waste; others are disposed of as municipal waste | Wastes contacted by blood are infectious municipal waste; diapers without blood are treated as non-infectious municipal waste | Can be disposed of as municipal wastes |
| Overall extent of regulation                                                                                    | Extremely significant                  | Not likely                            | Significant                                                            | Very significant                                                                                            |                                                                                                                               | Not likely                             |
